# Supplementary material for: Binding of Ni2+ and Cu2+ ions to peptides with a Cys–His motif
Source: Royal Society of Chemistry journal article supplement (doi:10.1039/b806851h), 2008-01-01
Supplement: b806851h.pdf [file b806851h.pdf]

## **ELECTRONIC SUPPLEMENTARY INFORMATION**

### **BINDING OF Ni<sup>2+</sup> AND Cu<sup>2+</sup> IONS TO PEPTIDES WITH CYS-HIS MOTIF**

Kinga Kulon,<sup>1</sup> Daniela Valensin,<sup>2</sup> Wojciech Kamysz,<sup>3</sup> Rafał Nadolny,<sup>3</sup> Elena Gaggelli,<sup>2</sup>  
Gianni Valensin<sup>2</sup> and Henryk Kozłowski<sup>1\*</sup>

<sup>1</sup>*Faculty of Chemistry, University of Wrocław, F. Joliot-Curie 14, 50-383 Wrocław, Poland*

<sup>2</sup>*Department of Chemistry, University of Siena via Aldo Moro, 53-100 Siena (Italy)*

<sup>3</sup>*Department of Inorganic Chemistry, Faculty of Pharmacy, Medical University of Gdańsk, Al. Gen. Hallera 107, 80-416 Gdańsk, Poland*

\*Corresponding author: e-mail: [henrykoz@wchuwr.pl](mailto:henrykoz@wchuwr.pl); phone and fax: +4871-375-7251

**Table 1S.** Potentiometric and spectroscopic data for proton and Ni<sup>2+</sup> complexes of **Ac-nW** Ac-GGKPDLRPCHP-NH<sub>2</sub>. Metal to ligand ratio = 1:1.1; [Ni<sup>2+</sup>] = 0.001 M.

| Species            | log β     | logK                                       | UV-Vis |                                    | CD                |                                     |
|--------------------|-----------|--------------------------------------------|--------|------------------------------------|-------------------|-------------------------------------|
|                    |           |                                            | λ/nm   | ε/M <sup>-1</sup> cm <sup>-1</sup> | λ/nm              | Δε/M <sup>-1</sup> cm <sup>-1</sup> |
| HL                 | 10.60(1)  | logK <sub>NH<sub>2</sub>-Lys</sub> = 10.60 |        |                                    |                   |                                     |
| H <sub>2</sub> L   | 19.32(1)  | logK <sub>Cys</sub> = 8.72                 |        |                                    |                   |                                     |
| H <sub>3</sub> L   | 25.60(1)  | logK <sub>Nim</sub> = 6.28                 |        |                                    |                   |                                     |
| H <sub>4</sub> L   | 29.15(1)  | logK <sub>Asp</sub> = 3.55                 |        |                                    |                   |                                     |
| NiHL               | 15.17(6)  |                                            | minor  |                                    |                   |                                     |
| NiL                | 8.60(1)   | 6.57                                       | 494    | 469                                | 569               | -0.598                              |
|                    |           |                                            | 374    | 1528                               | 487               | +3.699                              |
|                    |           |                                            | 286    | 2867                               | 381               | -2.917                              |
|                    |           |                                            |        |                                    | 330               | +0.509                              |
|                    |           |                                            |        |                                    | 308 <sub>sh</sub> | -2.192                              |
|                    |           |                                            |        |                                    | 282               | -4.235                              |
|                    |           |                                            |        |                                    | 237               | -3.172                              |
|                    |           |                                            | 219    | -4.559                             |                   |                                     |
| NiH <sub>1</sub> L | -1.36(3)  | 9.96                                       | 495    | 455                                | 542               | -1.473                              |
|                    |           |                                            | 374    | 1474                               | 482               | +4.654                              |
|                    |           |                                            | 286    | 2869                               | 382               | -3.740                              |
|                    |           |                                            |        |                                    | 337               | +0.553                              |
|                    |           |                                            |        |                                    | 305 <sub>sh</sub> | -9.205                              |
|                    |           |                                            |        |                                    | 285               | -11.786                             |
|                    |           |                                            |        |                                    | 246               | -4.391                              |
|                    |           |                                            | 223    | +12.217                            |                   |                                     |
| NiH <sub>2</sub> L | -11.99(2) | 10.64                                      | 493    | 406                                | 544               | -0.968                              |
|                    |           |                                            | 374    | 1257                               | 484               | +3.536                              |
|                    |           |                                            | 285    | 2867                               | 381               | -3.012                              |
|                    |           |                                            |        |                                    | 338               | +0.213                              |
|                    |           |                                            |        |                                    | 305 <sub>sh</sub> | -6.690                              |
|                    |           |                                            |        |                                    | 285               | -8.818                              |
|                    |           |                                            |        |                                    | 246               | -4.643                              |
|                    |           |                                            | 222    | +9.707                             |                   |                                     |

**Table 2S.** Potentiometric and spectroscopic data for proton and Ni<sup>2+</sup> complexes of **Ac-cW** Ac-PCHYIPRPKPR-NH<sub>2</sub>. Metal to ligand ratio = 1:1; [Ni<sup>2+</sup>] = 0.001 M.

| Species            | log β    | logK                                       | UV-Vis |                                    | CD                |                                     |
|--------------------|----------|--------------------------------------------|--------|------------------------------------|-------------------|-------------------------------------|
|                    |          |                                            | λ/nm   | ε/M <sup>-1</sup> cm <sup>-1</sup> | λ/nm              | Δε/M <sup>-1</sup> cm <sup>-1</sup> |
| HL                 | 11.30(2) | logK <sub>NH<sub>2</sub>-Lys</sub> = 11.30 |        |                                    |                   |                                     |
| H <sub>2</sub> L   | 21.14(2) | logK <sub>O-Tyr</sub> = 9.84               |        |                                    |                   |                                     |
| H <sub>3</sub> L   | 29.85(3) | logK <sub>Cys</sub> = 8.70                 |        |                                    |                   |                                     |
| H <sub>4</sub> L   | 36.07(3) | logK <sub>Nim</sub> = 6.22                 |        |                                    |                   |                                     |
| NiHL               | 19.28(1) |                                            | 500    | 455                                | 547               | -1.904                              |
|                    |          |                                            | 374    | 1277                               | 486               | +4.801                              |
|                    |          |                                            | 282    | 2693                               | 380               | -3.163                              |
|                    |          |                                            |        |                                    | 340               | +0.837                              |
|                    |          |                                            |        |                                    | 303               | -11.734                             |
|                    |          |                                            |        |                                    | 284               | -12.751                             |
|                    |          |                                            |        |                                    | 226               | +4.858                              |
| NiL                | 9.09(4)  | 10.19                                      | 500    | 455                                | 547               | -2.011                              |
|                    |          |                                            | 376    | 1189                               | 486               | +4.340                              |
|                    |          |                                            | 282    | 2690                               | 382               | -2.397                              |
|                    |          |                                            |        |                                    | 338               | +0.926                              |
|                    |          |                                            |        |                                    | 304               | -8.301                              |
|                    |          |                                            |        |                                    | 281               | -9.244                              |
|                    |          |                                            |        |                                    | 234               | +3.239                              |
| NiH <sub>1</sub> L | -1.59(4) | 10.69                                      | 500    | 386                                | 556               | -0.727                              |
|                    |          |                                            | 377    | 958                                | 494               | +2.402                              |
|                    |          |                                            | 280    | 2690                               | 435               | -1.450                              |
|                    |          |                                            |        |                                    | 375 <sub>sh</sub> | -1.105                              |
|                    |          |                                            |        |                                    | 308               | -1.183                              |
|                    |          |                                            |        |                                    | 293               | +0.884                              |
|                    |          |                                            |        |                                    | 271               | -2.077                              |
|                    |          |                                            |        |                                    | 251               | +1.823                              |

**Table 3S.** Potentiometric and spectroscopic data for proton and Ni<sup>2+</sup> complexes of **Ac-sW** Ac-PCHPPCHYIPR-NH<sub>2</sub>. Metal to ligand ratio = 1:1; [Ni<sup>2+</sup>] = 0.001 M.

| Species            | log β     | logK                         | UV-Vis |                                    | CD                                                   |                                     |
|--------------------|-----------|------------------------------|--------|------------------------------------|------------------------------------------------------|-------------------------------------|
|                    |           |                              | λ/nm   | ε/M <sup>-1</sup> cm <sup>-1</sup> | λ/nm                                                 | Δε/M <sup>-1</sup> cm <sup>-1</sup> |
| HL                 | 9.65(1)   | logK <sub>O-Tyr</sub> = 9.65 |        |                                    |                                                      |                                     |
| H <sub>2</sub> L   | 16.33(1)  | logK <sub>Nim</sub> = 6.68   |        |                                    |                                                      |                                     |
| H <sub>3</sub> L   | 22.16(1)  | logK <sub>Nim</sub> = 5.83   |        |                                    |                                                      |                                     |
| NiH <sub>2</sub> L | 19.01(9)  |                              | minor  |                                    |                                                      |                                     |
| NiHL               | 12.75(4)  | 6.26                         | minor  |                                    |                                                      |                                     |
| NiL                | 4.13(6)   | 8.62                         | minor  |                                    |                                                      |                                     |
| NiH <sub>1</sub> L | -4.25(2)  | 8.38                         | -      |                                    | 788 +0.071<br>277 <sub>sh</sub> -0.467<br>233 -4.829 |                                     |
| NiH <sub>2</sub> L | -14.31(2) | 10.06                        | -      |                                    | 526 -0.264<br>293 -0.533<br>261 +0.640<br>226 -8.373 |                                     |

**Table 4S.** Potentiometric and spectroscopic data for proton and Ni<sup>2+</sup> complexes of **nW** GKPDLRPCHP-NH<sub>2</sub>. Metal to ligand ratio = 1:1.1; [Ni<sup>2+</sup>] = 0.001 M.

| Species            | log β     | logK                                       | UV-Vis                                                             |                                    | CD                                                                                      |                                                                                        |
|--------------------|-----------|--------------------------------------------|--------------------------------------------------------------------|------------------------------------|-----------------------------------------------------------------------------------------|----------------------------------------------------------------------------------------|
|                    |           |                                            | λ/nm                                                               | ε/M <sup>-1</sup> cm <sup>-1</sup> | λ/nm                                                                                    | Δε/M <sup>-1</sup> cm <sup>-1</sup>                                                    |
| HL                 | 10.58(1)  | logK <sub>NH<sub>2</sub>-Lys</sub> = 10.58 |                                                                    |                                    |                                                                                         |                                                                                        |
| H <sub>2</sub> L   | 19.37(1)  | logK <sub>Cys</sub> = 8.78                 |                                                                    |                                    |                                                                                         |                                                                                        |
| H <sub>3</sub> L   | 26.97(1)  | logK <sub>NH<sub>2</sub></sub> = 7.60      |                                                                    |                                    |                                                                                         |                                                                                        |
| H <sub>4</sub> L   | 33.16(1)  | logK <sub>Nim</sub> = 6.18                 |                                                                    |                                    |                                                                                         |                                                                                        |
| H <sub>5</sub> L   | 36.85(1)  | logK <sub>Asp</sub> = 3.70                 |                                                                    |                                    |                                                                                         |                                                                                        |
| NiH <sub>3</sub> L | 29.83(2)  |                                            | 398 <sub>sh</sub><br>340 <sub>sh</sub><br>291 <sub>sh</sub>        | 78<br>198<br>451                   | -                                                                                       | -                                                                                      |
| NiHL               | 16.42(1)  | 6.70 (2H <sup>+</sup> )                    | 496<br>374 <sub>sh</sub><br>336 <sub>sh</sub><br>285 <sub>sh</sub> | 349<br>1200<br>1783<br>2681        | 556<br>485<br>382<br>305 <sub>sh</sub><br>282<br>226 <sub>sh</sub><br>215               | -0.058<br>+0.264<br>-0.207<br>-0.327<br>-0.535<br>-7.529<br>-13.784                    |
| NiL                | 8.14(1)   | 8.28                                       | 495<br>374 <sub>sh</sub><br>284 <sub>sh</sub>                      | 371<br>1174<br>2767                | 547<br>484<br>384<br>338<br>305 <sub>sh</sub><br>283<br>225 <sub>sh</sub><br>215        | -0.121<br>+0.356<br>-0.327<br>+0.072<br>-0.770<br>-1.079<br>-6.255<br>-15.531          |
| NiH <sub>1</sub> L | -1.61(1)  | 9.75                                       | 493<br>374 <sub>sh</sub><br>284 <sub>sh</sub>                      | 351<br>1065<br>2780                | 543<br>486<br>427 <sub>sh</sub><br>386<br>338<br>306 <sub>sh</sub><br>284<br>234<br>215 | -0.104<br>+0.228<br>-0.225<br>-0.337<br>+0.072<br>-0.663<br>-1.284<br>-3.927<br>-5.612 |
| NiH <sub>2</sub> L | -12.33(1) | 10.72                                      | 477<br>374 <sub>sh</sub><br>284 <sub>sh</sub>                      | 286<br>703<br>2783                 | 507<br>437<br>387 <sub>sh</sub><br>233<br>217                                           | +0.153<br>-0.533<br>-0.242<br>-3.912<br>-7.666                                         |

**Table 5S.** Potentiometric and spectroscopic data for proton and Ni<sup>2+</sup> complexes of **cW** PCHYIPRPKPR-NH<sub>2</sub>. Metal to ligand ratio = 1:3; [Ni<sup>2+</sup>] = 0.0003 M.

| Species          | log β    | logK                            | UV-Vis                   |                                    | CD                                            |                                                |
|------------------|----------|---------------------------------|--------------------------|------------------------------------|-----------------------------------------------|------------------------------------------------|
|                  |          |                                 | λ/nm                     | ε/M <sup>-1</sup> cm <sup>-1</sup> | λ/nm                                          | Δε/M <sup>-1</sup> cm <sup>-1</sup>            |
| HL               | 11.47(2) | logK <sub>NH2-Lys</sub> = 11.47 |                          |                                    |                                               |                                                |
| H <sub>2</sub> L | 21.40(1) | logK <sub>O-Tyr</sub> = 9.93    |                          |                                    |                                               |                                                |
| H <sub>3</sub> L | 30.46(2) | logK <sub>Cys</sub> = 9.06      |                          |                                    |                                               |                                                |
| H <sub>4</sub> L | 38.40(2) | logK <sub>NH</sub> = 7.94       |                          |                                    |                                               |                                                |
| H <sub>5</sub> L | 44.49(2) | logK <sub>Nim</sub> = 6.09      |                          |                                    |                                               |                                                |
| NiHL             | 24.67(4) |                                 | 457<br>331               | 445<br>2229                        | 495<br>424<br>338<br>272<br>233 <sub>sh</sub> | -0.381<br>+0.669<br>+0.433<br>-1.788<br>-7.159 |
| NiL              | 18.23(6) | 6.44                            | 454<br>334 <sub>sh</sub> | 421<br>1309                        | 506<br>428<br>337<br>276<br>235 <sub>sh</sub> | -1.193<br>+1.660<br>+3.830<br>-9.506<br>-8.613 |

**Table 6S.** Potentiometric and spectroscopic data for proton and Ni<sup>2+</sup> complexes of **sW** PCHPPCHYIPR-NH<sub>2</sub>. Metal to ligand ratio = 1:3; [Ni<sup>2+</sup>] = 0.0003 M.

| Species            | log β     | logK                         | UV-Vis                   |                                    | CD                                            |                                                 |
|--------------------|-----------|------------------------------|--------------------------|------------------------------------|-----------------------------------------------|-------------------------------------------------|
|                    |           |                              | λ/nm                     | ε/M <sup>-1</sup> cm <sup>-1</sup> | λ/nm                                          | Δε/M <sup>-1</sup> cm <sup>-1</sup>             |
| HL                 | 9.75(1)   | logK <sub>O-Tyr</sub> = 9.75 |                          |                                    |                                               |                                                 |
| H <sub>2</sub> L   | 18.12(1)  | logK <sub>NH2</sub> = 8.37   |                          |                                    |                                               |                                                 |
| H <sub>3</sub> L   | 24.71(1)  | logK <sub>Nim</sub> = 6.59   |                          |                                    |                                               |                                                 |
| H <sub>4</sub> L   | 30.52(1)  | logK <sub>Nim</sub> = 5.81   |                          |                                    |                                               |                                                 |
| NiH <sub>1</sub> L | 0.48(3)   |                              | 424                      | 202                                | 477<br>415<br>289 <sub>sh</sub><br>257<br>234 | -2.510<br>+2.135<br>+1.973<br>+5.620<br>-9.617  |
| NiH <sub>2</sub> L | -8.62(7)  | 9.10                         | 421<br>284 <sub>sh</sub> | 241<br>5207                        | 478<br>416<br>310<br>259<br>233               | -2.593<br>+2.296<br>+0.483<br>+6.753<br>-14.732 |
| NiH <sub>3</sub> L | -19.47(9) | 10.85                        | minor                    |                                    |                                               |                                                 |

**Table 7S.**  $^1\text{H}$  Chemical shift of nW fragments 2.0 mM in  $\text{D}_2\text{O}$  at pH 7.8 and 298 K

|        | H $\alpha$ | H $\beta$ | H $\gamma$ | Others                               |
|--------|------------|-----------|------------|--------------------------------------|
| Gly-1  | 3.59       |           |            |                                      |
| Gly-2  | 3.98       |           |            |                                      |
| Lys-3  | 4.65       | 1.85      | 1.47       | H $\delta$ 1.71<br>H $\epsilon$ 3.00 |
| Pro-4* | 4.41       | 2.27-2.02 | 1.87       | H $\delta$ 3.82-3.65                 |
| Asp-5  | 4.57       | 2.71-2.57 |            |                                      |
| Leu-6  | 4.35       | 1.61      | 1.61       | H $\delta$ 0.87                      |
| Arg-7  | 4.61       | 1.84-1.76 | 1.69       | H $\delta$ 3.21                      |
| Pro-8* | 4.41       | 2.27-2.02 | 1.87       | H $\delta$ 3.82-3.65                 |
| Cys-9  | 4.38       | 2.86      |            |                                      |
| His-10 | 4.90       | 3.07      |            | H $\delta$ 7.70<br>H $\epsilon$ 7.00 |
| Pro-11 | 4.38       | 2.26      | 1.94       | H $\delta$ 3.77-3.46                 |

\*The two proline were not distinguishable.



**Table 8S.**  $^1\text{H}$  Chemical shift of Ac-nW fragments 2.0 mM in  $\text{D}_2\text{O}$  at pH 8.5 and 298 K

|        | H $\alpha$ | H $\beta$ | H $\gamma$ | Others                               |
|--------|------------|-----------|------------|--------------------------------------|
| Gly-1  | 3.93       |           |            |                                      |
| Gly-2  | 3.93       |           |            |                                      |
| Lys-3  | 4.65       | 1.85      | 1.47       | H $\delta$ 1.71<br>H $\epsilon$ 3.00 |
| Pro-4  | 4.41       | 2.27-2.02 | 1.87       | H $\delta$ 3.82-3.65                 |
| Asp-5  | 4.57       | 2.71-2.57 |            |                                      |
| Leu-6  | 4.35       | 1.61      | 1.61       | H $\delta$ 0.87                      |
| Arg-7  | 4.61       | 1.84-1.76 | 1.69       | H $\delta$ 3.21                      |
| Pro-8  | 4.41       | 2.27-2.02 | 1.87       | H $\delta$ 3.82-3.65                 |
| Cys-9  | 4.38       | 2.86      |            |                                      |
| His-10 | 4.90       | 3.07      |            | H $\delta$ 7.70<br>H $\epsilon$ 7.00 |
| Pro-11 | 4.38       | 2.26      | 1.94       | H $\delta$ 3.77-3.46                 |

\*The two proline were not distinguishable.

**Table 9S.**  $^1\text{H}$  Chemical shift of cW fragments 2.0 mM in  $\text{D}_2\text{O}$  at pH 8.5 and 298 K

|         | H $\alpha$ | H $\beta$ | H $\gamma$ | Others                               |
|---------|------------|-----------|------------|--------------------------------------|
| Pro-12  | 4.10       | 2.28      | 1.89       | H $\delta$ 3.18                      |
| Cys-13  | 4.27       | 2.80      |            |                                      |
| His-14  | 4.62       | 3.00      |            | H $\delta$ 6.85<br>H $\epsilon$ 7.65 |
| Tyr-15  | 4.52       | 2.97      |            | H $\delta$ 7.06<br>H $\epsilon$ 6.80 |
| Ile-16  | 4.35       | 1.75      | 1.43-1.10  | H $\delta$ 0.89                      |
| Pro-17  | 4.31       | 2.28      | 1.97       | H $\delta$ 3.65                      |
| Arg-18  | 4.60       | 1.76      | 1.76       | H $\delta$ 3.21                      |
| Pro-19* | 4.42       | 2.30-1.90 | 2.00       | H $\delta$ 3.83–3.63                 |
| Lys-20  | 4.58       | 1.73      | 1.53       | H $\delta$ 1.73<br>H $\epsilon$ 3.03 |
| Pro-21* | 4.42       | 2.30-1.90 | 2.00       | H $\delta$ 3.83–3.63                 |
| Arg-22  | 4.26       | 1.86      | 1.71       | H $\delta$ 3.21                      |

\*The two proline were not distinguishable.

**Table 10S.** <sup>1</sup>H Chemical shift of Ac-cW fragments 2.0 mM in D<sub>2</sub>O at pH 8.4 and 298 K

|         | H $\alpha$ | H $\beta$ | H $\gamma$ | Others                               |
|---------|------------|-----------|------------|--------------------------------------|
| Pro-12  | 4.35       | 2.27      | 1.95       | H $\delta$ 3.64                      |
| Cys-13  | 4.29       | 2.80      |            |                                      |
| His-14  | 4.62       | 3.00      |            | H $\delta$ 6.87<br>H $\epsilon$ 7.65 |
| Tyr-15  | 4.51       | 2.97      |            | H $\delta$ 7.06<br>H $\epsilon$ 6.80 |
| Ile-16  | 4.35       | 1.76      | 1.45-1.10  | H $\delta$ 0.87                      |
| Pro-17  | 4.31       | 2.28      | 1.97       | H $\delta$ 3.66                      |
| Arg-18  | 4.60       | 1.76      | 1.76       | H $\delta$ 3.21                      |
| Pro-19* | 4.42       | 2.30-1.90 | 2.00       | H $\delta$ 3.82–3.62                 |
| Lys-20  | 4.58       | 1.73      | 1.53       | H $\delta$ 1.73<br>H $\epsilon$ 3.03 |
| Pro-21* | 4.42       | 2.30-1.90 | 2.00       | H $\delta$ 3.82–3.62                 |
| Arg-22  | 4.26       | 1.86      | 1.71       | H $\delta$ 3.21                      |

\*The two proline were not distinguishable.

**Table 11S.**  $^1\text{H}$  Chemical shift of sW fragments 2.0 mM in  $\text{D}_2\text{O}$  at pH 8.5 and 298 K

|        | H $\alpha$ | H $\beta$ | H $\gamma$ | Others                               |
|--------|------------|-----------|------------|--------------------------------------|
| Pro-8  | 3.99       | 2.21      | 1.85       | H $\delta$ 3.14                      |
| Cys-9  | 4.63       | 3.12      |            |                                      |
| His-10 | 4.94       | 3.10-2.92 |            | H $\delta$ 7.00<br>H $\epsilon$ 7.70 |
| Pro-11 | 4.40       | 2.30-1.81 | 2.10-1.99  | H $\delta$ 4.02–3.49                 |
| Pro-12 | 4.48       | 2.21-1.84 | 2.10-1.93  | H $\delta$ 3.60–3.50                 |
| Cys-13 | 4.43       | 3.24-3.14 |            |                                      |
| His-14 | 4.64       | 3.00      |            | H $\delta$ 6.89<br>H $\epsilon$ 7.66 |
| Tyr-15 | 4.54       | 2.94      |            | H $\delta$ 7.04<br>H $\epsilon$ 6.89 |
| Ile-16 | 4.35       | 1.72      | 1.42-1.06  | H $\delta$ 0.86                      |
| Pro-17 | 4.30       | 2.31      | 2.02-1.92  | H $\delta$ 3.63                      |
| Arg-18 | 4.28       | 1.85      | 1.77-1.69  | H $\delta$ 3.21                      |

**Table 12S.**  $^1\text{H}$  Chemical shift of Ac-sW fragments 2.0 mM in  $\text{D}_2\text{O}$  at pH 8.5 and 298 K

|        | H $\alpha$ | H $\beta$ | H $\gamma$ | Others                               |
|--------|------------|-----------|------------|--------------------------------------|
| Pro-8  | 4.22       | 2.14-1.71 | 1.91       | H $\delta$ 3.58                      |
| Cys-9  | 4.61       | 3.15      |            |                                      |
| His-10 | 4.93       | 3.10-2.93 |            | H $\delta$ 7.00<br>H $\epsilon$ 7.71 |
| Pro-11 | 4.42       | 2.30-1.81 | 2.10-1.99  | H $\delta$ 4.03-3.51                 |
| Pro-12 | 4.47       | 2.21-1.84 | 2.10-1.93  | H $\delta$ 3.60-3.50                 |
| Cys-13 | 4.44       | 3.25-3.13 |            |                                      |
| His-14 | 4.65       | 2.99      |            | H $\delta$ 6.89<br>H $\epsilon$ 7.68 |
| Tyr-15 | 4.54       | 2.94      |            | H $\delta$ 7.04<br>H $\epsilon$ 6.79 |
| Ile-16 | 4.34       | 1.72      | 1.41-1.06  | H $\delta$ 0.86                      |
| Pro-17 | 4.28       | 2.30      | 2.02-1.92  | H $\delta$ 3.65                      |
| Arg-18 | 4.28       | 1.85      | 1.77-1.69  | H $\delta$ 3.21                      |

**Table 13S.** Potentiometric and spectroscopic data for proton and Cu<sup>2+</sup> complexes of **Ac-sW** Ac-PCHPPCHYIPR-NH<sub>2</sub>. Metal to ligand ratio = 1:1; [Cu<sup>2+</sup>] = 0.001 M.

| Species            | log β     | logK                         | UV-Vis |                                    | CD                 |                                     | EPR                 |                 |
|--------------------|-----------|------------------------------|--------|------------------------------------|--------------------|-------------------------------------|---------------------|-----------------|
|                    |           |                              | λ/nm   | ε/M <sup>-1</sup> cm <sup>-1</sup> | λ/nm               | Δε/M <sup>-1</sup> cm <sup>-1</sup> | A <sub>  </sub> /mT | g <sub>  </sub> |
| HL                 | 9.65(1)   | logK <sub>O-Tyr</sub> = 9.65 |        |                                    |                    |                                     |                     |                 |
| H <sub>2</sub> L   | 16.33(1)  | logK <sub>Nim</sub> = 6.68   |        |                                    |                    |                                     |                     |                 |
| H <sub>3</sub> L   | 22.16(1)  | logK <sub>Nim</sub> = 5.83   |        |                                    |                    |                                     |                     |                 |
| CuL                | 8.27(1)   |                              | 593    | 41                                 | 713                | +0.147                              | 16,5                | 2.28            |
|                    |           |                              |        |                                    | 523                | +0.189                              |                     |                 |
|                    |           |                              |        |                                    | 338                | +0.259                              |                     |                 |
|                    |           |                              |        |                                    | 258                | +3.212                              |                     |                 |
| CuH <sub>1</sub> L | 1.39(2)   | 6.88                         | 580    | 83                                 | 627                | +0.268                              | 17,6                | 2.24            |
|                    |           |                              |        |                                    | 526                | +0.472                              |                     |                 |
|                    |           |                              |        |                                    | 337                | +0.610                              |                     |                 |
|                    |           |                              |        |                                    | 255                | +7.398                              |                     |                 |
|                    |           |                              |        |                                    | ?231 <sub>sh</sub> | +0.696                              |                     |                 |
| CuH <sub>2</sub> L | -8.14(2)  | 9.53                         | 575    | 101                                | 625                | +0.231                              | 17,3                | 2.24            |
|                    |           |                              |        |                                    | 524                | +0.395                              |                     |                 |
|                    |           |                              |        |                                    | 335                | +0.643                              |                     |                 |
|                    |           |                              |        |                                    | 255                | +7.283                              |                     |                 |
|                    |           |                              |        |                                    | 231 <sub>sh</sub>  | +0.734                              |                     |                 |
| CuH <sub>3</sub> L | -19.41(5) | 11.27                        | minor  |                                    |                    |                                     |                     |                 |

**Table 14S.** Potentiometric and spectroscopic data for proton and Cu<sup>2+</sup> complexes of **sW** PCHPPCHYIPR-NH<sub>2</sub>. Metal to ligand ratio = 1:1; [Cu<sup>2+</sup>] = 0.001 M.

| Species            | log β    | logK                         | UV-Vis            |                                    | CD                |                                     | EPR                 |                 |
|--------------------|----------|------------------------------|-------------------|------------------------------------|-------------------|-------------------------------------|---------------------|-----------------|
|                    |          |                              | λ/nm              | ε/M <sup>-1</sup> cm <sup>-1</sup> | λ/nm              | Δε/M <sup>-1</sup> cm <sup>-1</sup> | A <sub>  </sub> /mT | g <sub>  </sub> |
| HL                 | 9.75(1)  | logK <sub>O-Tyr</sub> = 9.75 |                   |                                    |                   |                                     |                     |                 |
| H <sub>2</sub> L   | 18.12(1) | logK <sub>NH2</sub> = 8.37   |                   |                                    |                   |                                     |                     |                 |
| H <sub>3</sub> L   | 24.71(1) | logK <sub>Nim</sub> = 6.59   |                   |                                    |                   |                                     |                     |                 |
| H <sub>4</sub> L   | 30.52(1) | logK <sub>Nim</sub> = 5.81   |                   |                                    |                   |                                     |                     |                 |
| CuHL               | 19.98(3) |                              | minor             |                                    |                   |                                     |                     |                 |
| CuL                | 14.67(3) | 5.31                         | 629               | 109                                | 671               | -0.981                              | 16,8                | 2.22            |
|                    |          |                              |                   |                                    | 571               | +0.383                              |                     |                 |
|                    |          |                              |                   |                                    | 489 <sub>sh</sub> | +0.285                              |                     |                 |
|                    |          |                              |                   |                                    | 332               | +0.332                              |                     |                 |
|                    |          |                              |                   |                                    | 282               | -1.380                              |                     |                 |
|                    |          |                              |                   |                                    | 239               | -3.702                              |                     |                 |
| CuH <sub>1</sub> L | 7.26(4)  | 7.41                         | 649 <sub>sh</sub> | 41                                 | 680 <sub>sh</sub> | -0.258                              | 20,8                | 2.17            |
|                    |          |                              | 518               | 118                                | 550               | -0.621                              |                     |                 |
|                    |          |                              |                   |                                    | 480               | +0.680                              |                     |                 |
|                    |          |                              |                   |                                    | 310               | +0.918                              |                     |                 |
|                    |          |                              |                   |                                    | 256               | +2.361                              |                     |                 |
|                    |          |                              |                   |                                    | 236               | -5.040                              |                     |                 |
| CuH <sub>2</sub> L | -2.40(6) | 9.66                         | 514               | 143                                | 551               | -0.932                              | 20,7                | 2.17            |
|                    |          |                              |                   |                                    | 480               | +0.811                              |                     |                 |
|                    |          |                              |                   |                                    | 312               | +1.054                              |                     |                 |
|                    |          |                              |                   |                                    | 255               | +3.902                              |                     |                 |
|                    |          |                              |                   |                                    | 231               | -9.353                              |                     |                 |

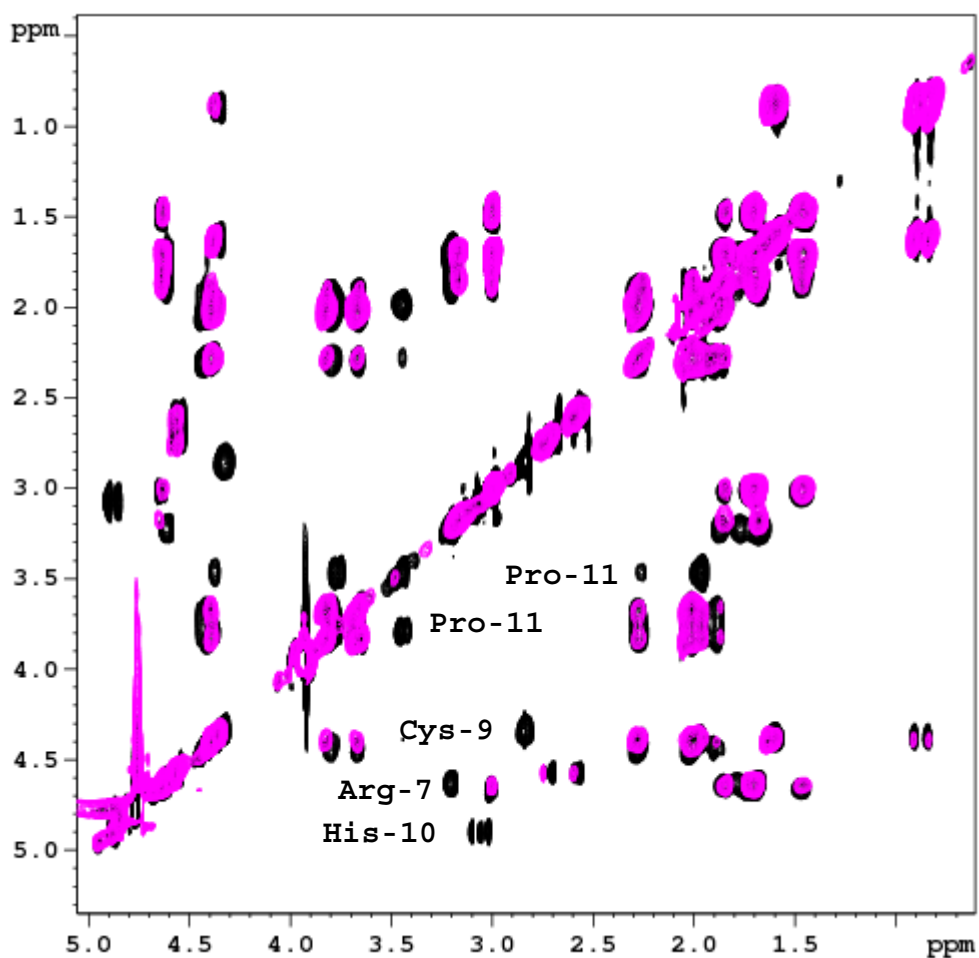

**Figure 1S.** Selected regions of the TOCSY spectrum of Ac-nW in D<sub>2</sub>O 2.0 mM at pH 8.5 and T 298 K: in the absence (black) and in the presence of 1.0 Ni<sup>2+</sup> eq. (magenta). The broadening of selected cross-peaks upon metal addition are shown.



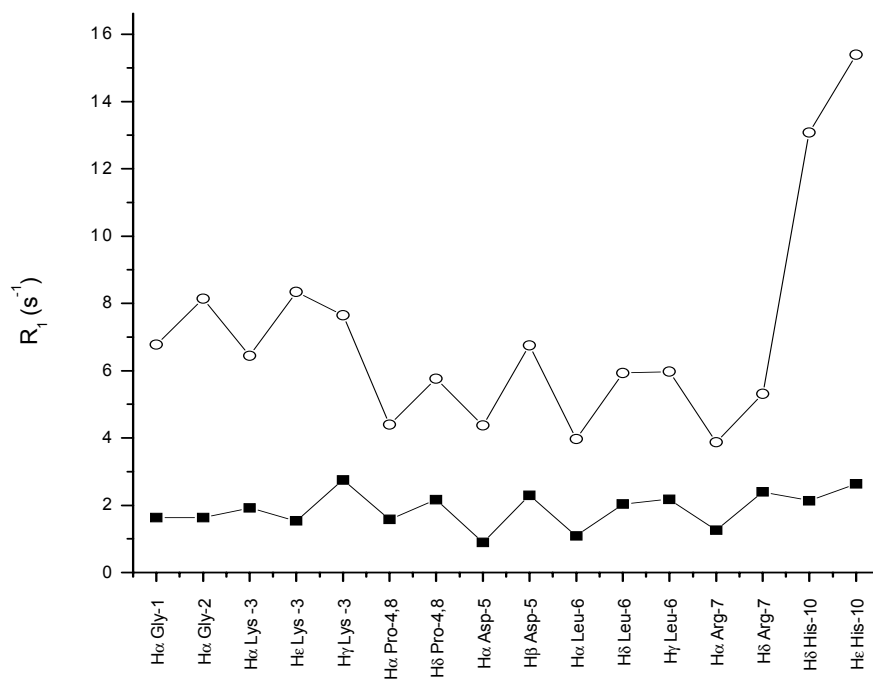

**Figure 2S.**  $^1\text{H}$  longitudinal relaxation rates of Ac-nW (solid square) and nW (open circle) calculated in presence of  $1.0 \text{ Ni}^{2+}$  equivalents.

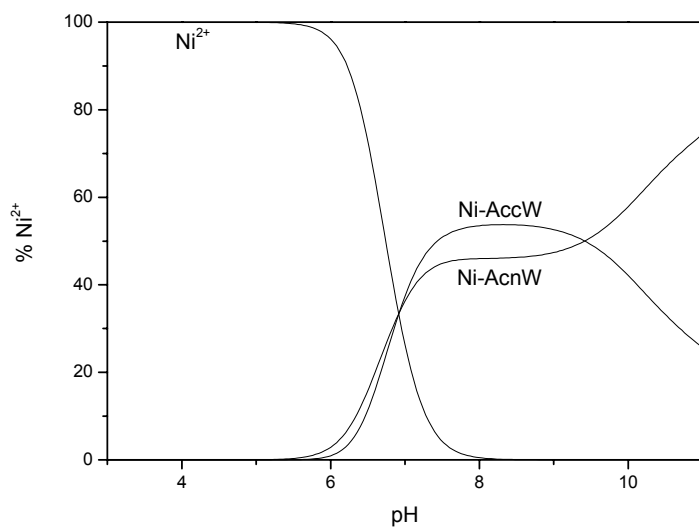

**Figure 3S.** tribution profile of competition between Ac-nW and Ac-cW in coordination of Ni<sup>2+</sup>; [Ni<sup>2+</sup>] = 0.001; ligand to metal ratio 1.1:1.

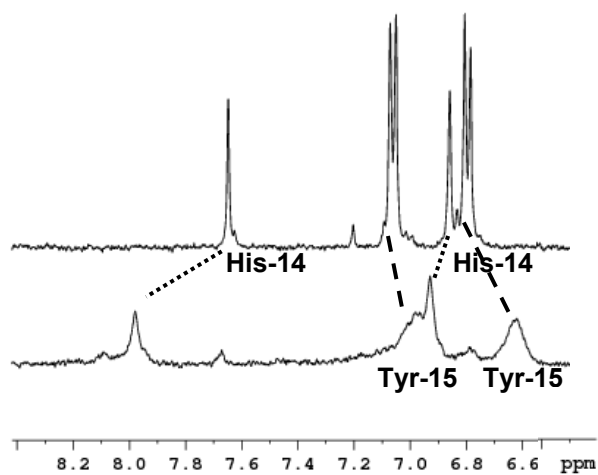

**Figure 4S.** Aromatic region of <sup>1</sup>H 1D spectra of the Ac-cW in absence (upper trace) and in the presence of 1.0 Ni<sup>2+</sup> (lower trace). The solutions were 2.0 mM, pH 8.4 T=298 in D<sub>2</sub>O.

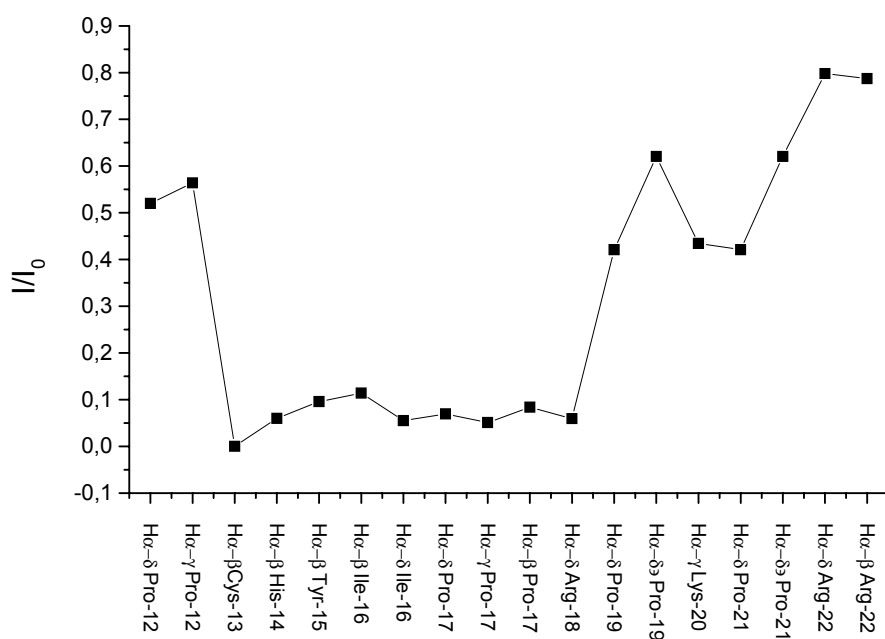

**Figure 5S.**  $I/I_0$  profiles of the  $^1\text{H}$ - $^1\text{H}$  TOCSY correlations of Ac-cW in absence ( $I_0$ ) and in presence (I) of 1.0  $\text{Ni}^{2+}$  equivalents; 2.0 mM, pH 8.4 and T=298.

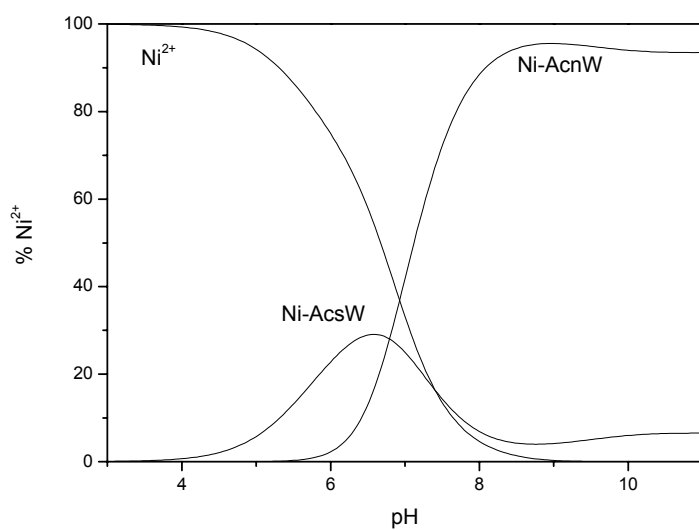

**Figure 6S.** Distribution profile of competition between Ac-nW and Ac-sW in coordination of Ni<sup>2+</sup>; [Ni<sup>2+</sup>] = 0.001; ligand to metal ratio 1.1:1.

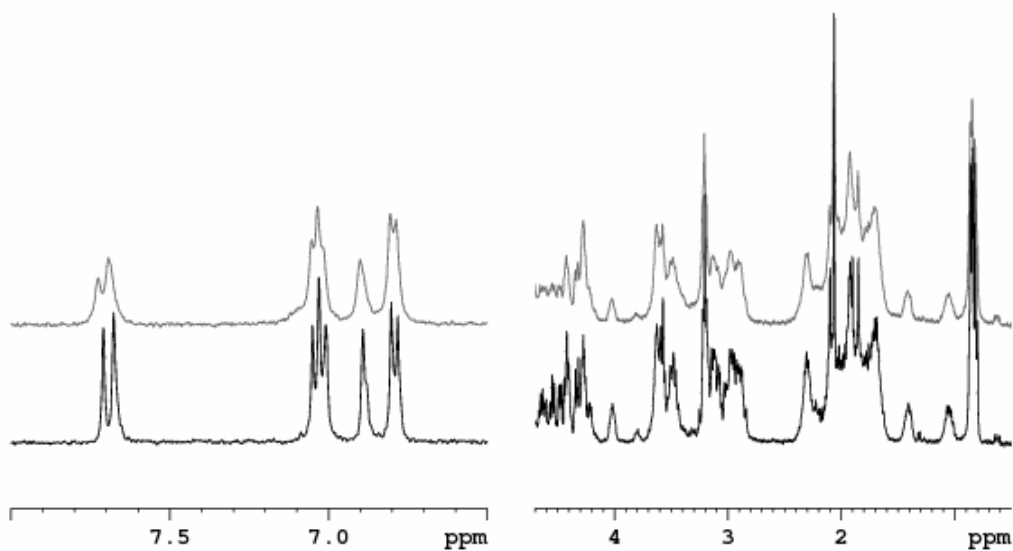

**Figure 7S.** <sup>1</sup>H NMR spectra of the Ac-sW in absence (black trace) and in the presence of 1.0 mM Ni<sup>2+</sup> (grey trace). The solutions were 1.0 mM, pH 6 T=298 in D<sub>2</sub>O.

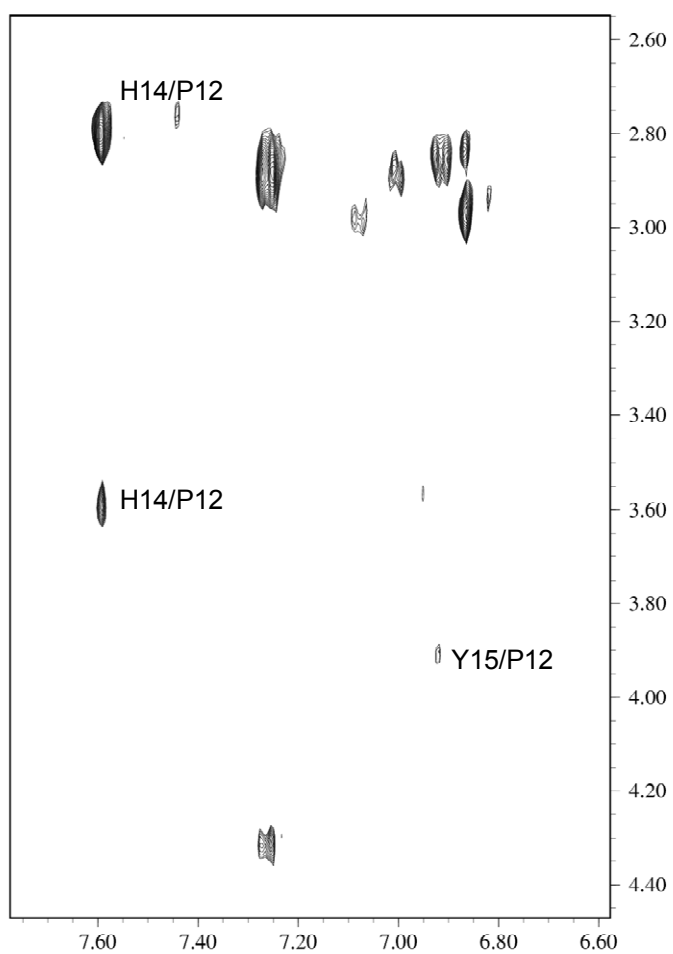

**Figure 8S.** Selected region of the NOESY spectrum of cW 2 mM at pH 8.5 in the presence of 1.0 Ni<sup>2+</sup> eq. The long range NOEs between residues located in the proximity of the binding site are indicated.

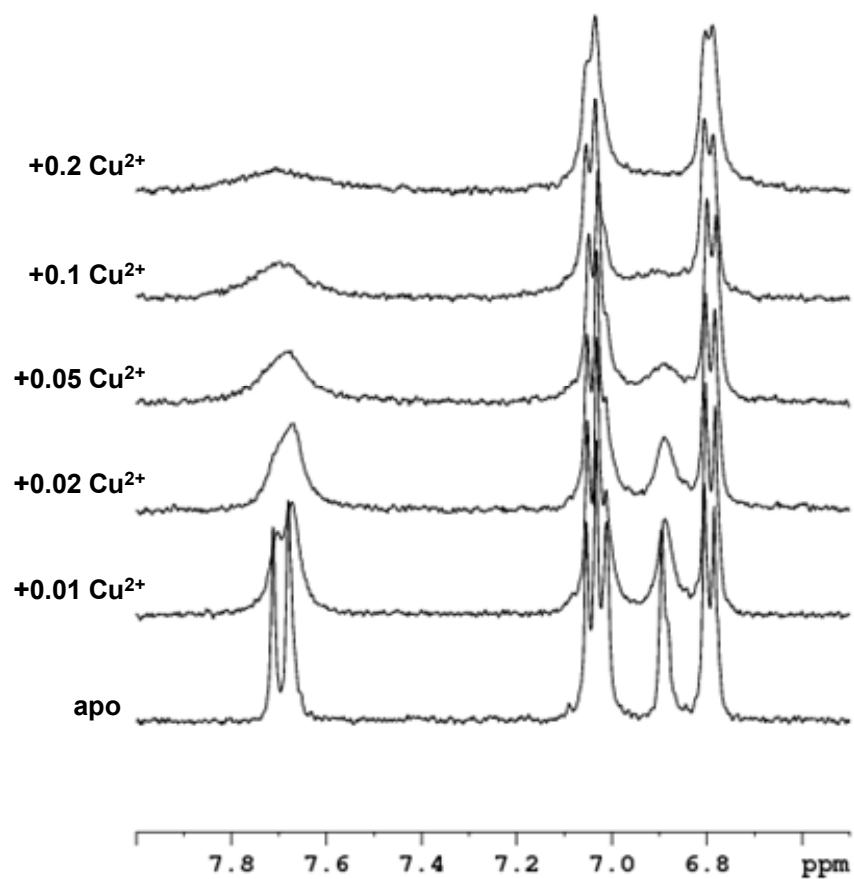

**Figure 9S.** Aromatic region of <sup>1</sup>H 1D spectra of the Ac-sW 2.0 mM T=298, pH 8.5, in the absence (apo) and in the presence of Cu<sup>2+</sup>.



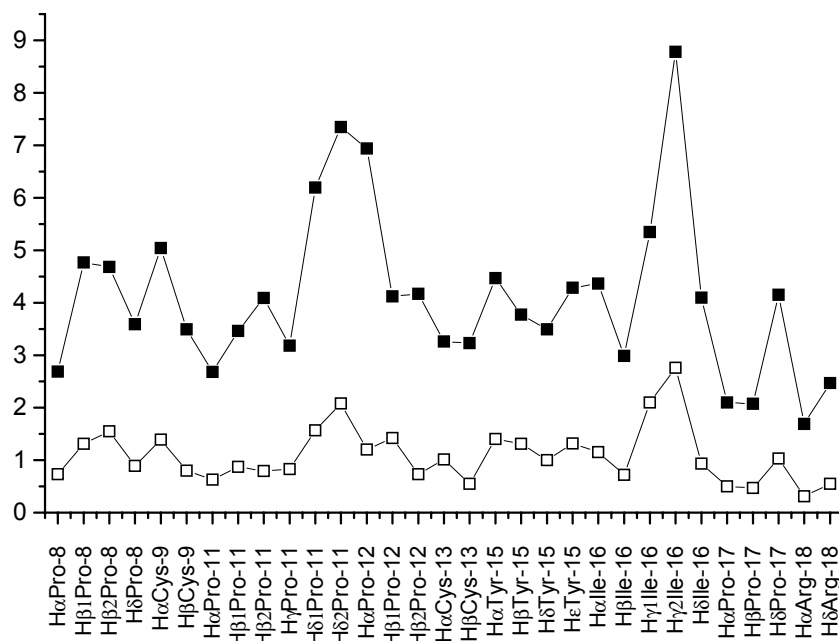

**Figure 10S.** Proton paramagnetic relaxation contributions ( $R_{1p}$ ) of Ac-sW, calculated in presence of 0.1 (open squares) and 0.4 (solid squares)  $\text{Cu}^{2+}$  equivalents.
